# Supplementary material for: Detection of alkali and alkaline earth metal ions using birefringence of hyperswollen lamellar phase
Source: Royal Society of Chemistry journal article supplement (doi:10.1039/d3ra00135k), 2023-01-01
Supplement: d3ra00135k1.pdf [file d3ra00135k1.pdf]

## **Alkali and Alkaline Earth Metal Ions Detection Using Birefringence of Hyperswollen Lamellar Phase**

Koki Sasaki, Shotaro Matoba, Yoshiaki Uchida,\* and Norikazu Nishiyama

Graduate School of Engineering Science, Osaka University, 1-3 Machikaneyama-cho, Toyonaka, Osaka 560-8531, Japan

### **Supporting Information**

#### Table of Contents

- Fig. S1** Molecular structure of Brij L4.
- Fig. S2** Polarized photographs of decane solution with HCl.
- Fig. S3** Polarized photographs of decane solution without and with CaCl<sub>2</sub>.
- Fig. S4** Polarized photographs of decane solution without and with NaOH.

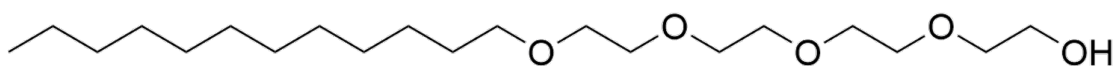

**Fig. S1** Molecular structure and schematic illustration of the interaction. Molecular structure of  $C_{12}E_4$ , the main component of Brij L4.

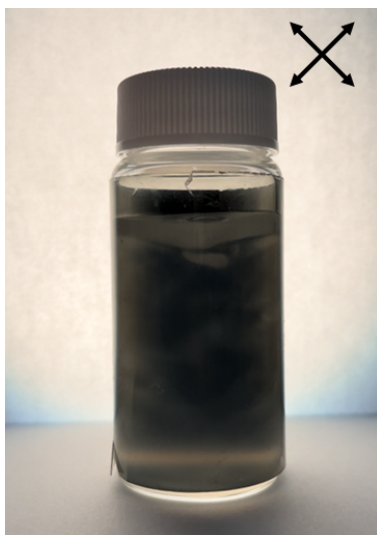

**Fig. S2** Polarized photographs of hyperswollen lamellar phases of decane solution of water ( $5.6 \times 10^{-4}$  M), Brij L4 ( $1.5 \times 10^{-4}$  M), and HCl ( $6.1 \times 10^{-5}$  M).

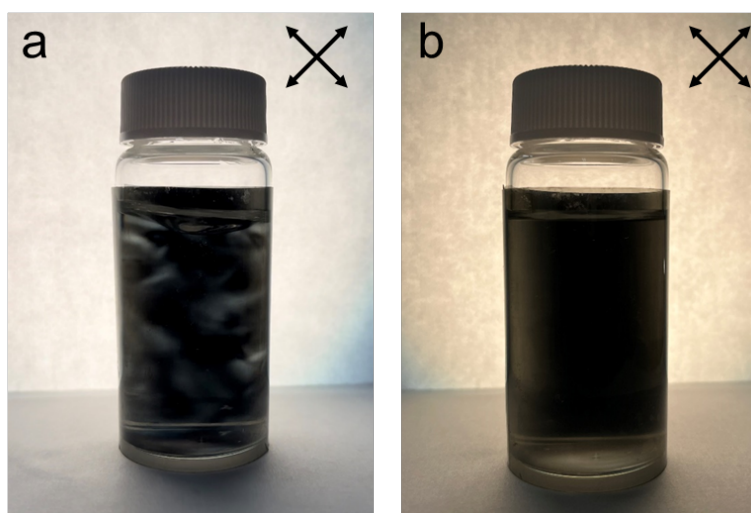

**Fig. S3** Polarized photographs of decane solution of water ( $5.6 \times 10^{-4}$  M) and Brij L4 ( $1.5 \times 10^{-4}$  M). Polarized photographs (a) without additives and (b) with  $CaCl_2$  ( $9.0 \times 10^{-6}$  M).

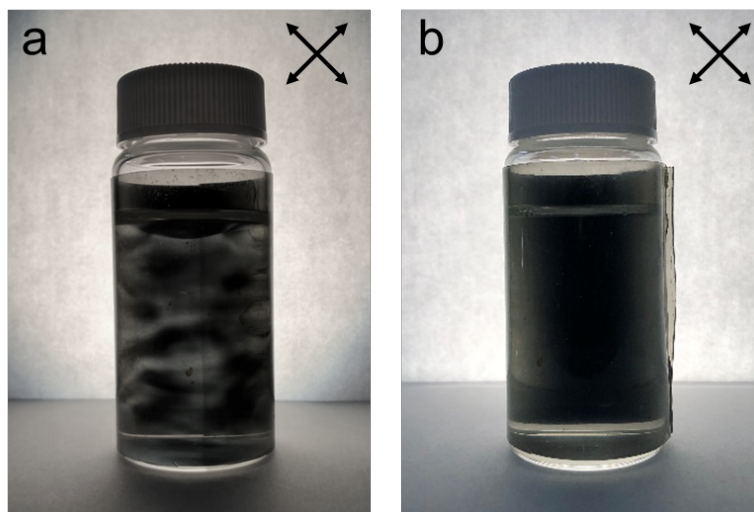

**Fig. S4** Polarized photographs of decane solution of water ( $5.6 \times 10^{-4}$  M) and Brij L4 ( $1.5 \times 10^{-4}$  M). Polarized photographs (a) without additives and (b) with NaOH ( $4.9 \times 10^{-6}$  M).
